# Supplementary material for: Intense nonlinear dielectric and magnetic resonances of core–shell Ni@graphene composites and their improved microwave absorption properties
Source: Royal Society of Chemistry journal article supplement (doi:10.1039/d0tc05946c), 2021-01-01
Supplement: d0tc05946c1.pdf [file d0tc05946c1.pdf]

## Supplementary Information

### Intense nonlinear dielectric and magnetic resonances to improve the microwave absorption properties of core/shell Ni@graphene composites

Ying Liu, Xiaoyu Zhang, Yanxia Wu, Caili Zhang, Jian Wang, Jianlong Ji, Kexun Li

#### 1. Morphology and particle size of the raw Ni powder

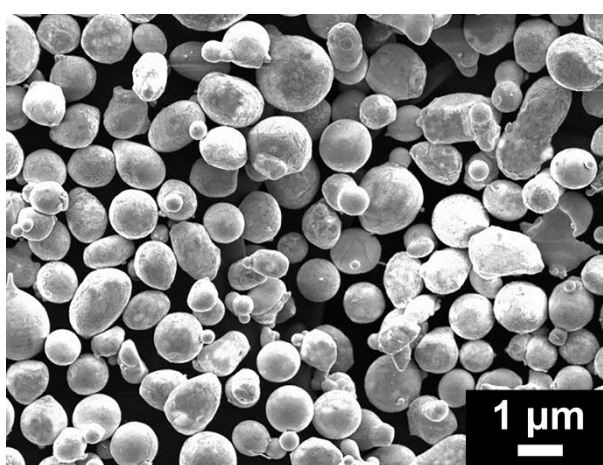

Figure S1 FESEM image of the pure Ni particles

#### 2. The 2D bands in the Raman spectra of the Ni@graphene composites

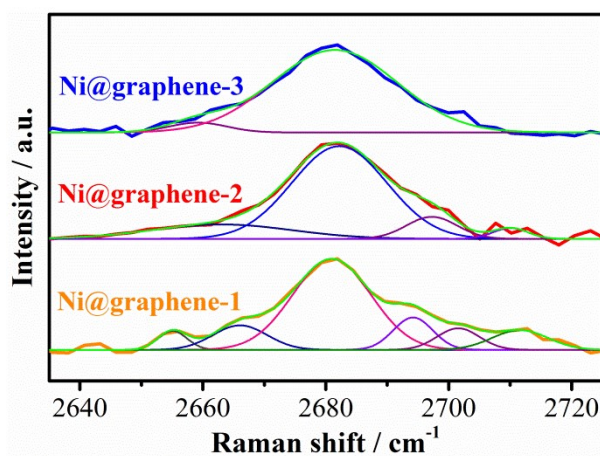

Figure S2 The enlarged 2D-band regions with the curve fit

3. **Table S1** Normalized intensities of the D, G, and 2D bands, and the ratio of  $I_D/I_G$  and  $I_{2D}/I_G$  of the Raman spectra for the Ni@graphene composites synthesized under different PMMA content

| Process parameters      |                     | Raman Spectra |        |          |           |              |
|-------------------------|---------------------|---------------|--------|----------|-----------|--------------|
| PMMA content<br>(mg/mL) | Temperature<br>(°C) | $I_D$         | $I_G$  | $I_{2D}$ | $I_D/I_G$ | $I_{2D}/I_G$ |
| 0.5                     | 900                 | 0.2548        | 0.1529 | 0.6848   | 1.6664    | 4.4787       |
| 1.0                     | 900                 | 0.1039        | 0.1081 | 0.7392   | 0.9611    | 6.8381       |
| 1.5                     | 900                 | 0.1763        | 0.2168 | 0.7490   | 0.8132    | 3.4548       |

4. FESEM images of the Ni@graphene composites

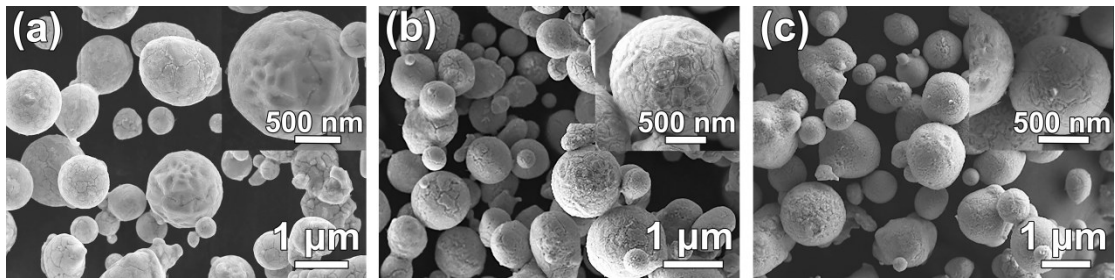

Figure S3 The morphology of the Ni@graphene composites

5. The complex permittivity and permeability at the resonant frequency region

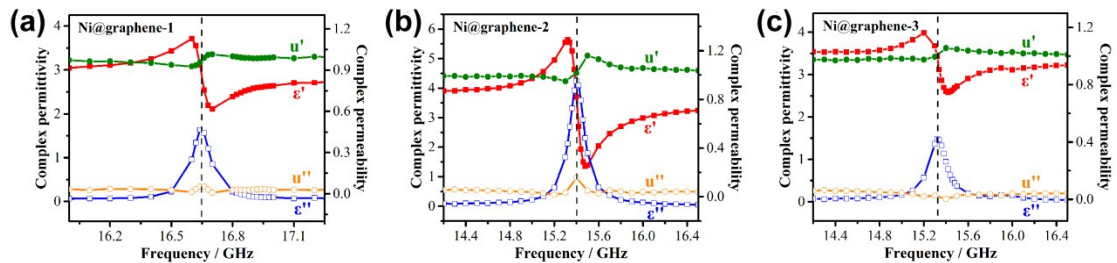

Figure S4 The complex permittivity and permeability of the Ni@graphene composites at the resonant frequency region

## 6. Dielectric and magnetic loss of Ni@graphene composites

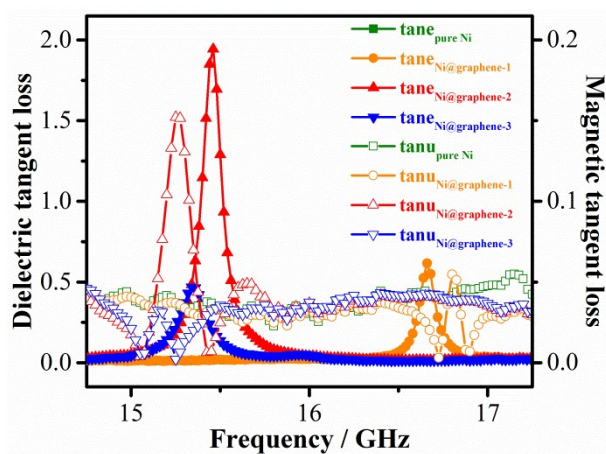

Figure S5 Dielectric tangent loss and magnetic tangent loss of the samples
